# Supplementary material for: Double-resonance17O NMR experiments reveal unique configurational information for surface organometallic complexes
Source: Royal Society of Chemistry journal article supplement (doi:10.1039/d3cc00899a), 2023-01-01
Supplement: d3cc00899a1.pdf [file d3cc00899a1.pdf]

Supporting Information for :

**Double-Resonance  $^{17}\text{O}$  NMR Experiments Reveal Unique Configurational Information for Surface Organometallic Complexes**

Frédéric A. Perras,<sup>a,b\*</sup> Alejandra Arroyave,<sup>c</sup> Scott A. Southern,<sup>b</sup> Jessica V. Lamb,<sup>c</sup> Yuting Li,<sup>a</sup> Anne LaPointe,<sup>d</sup> Massimiliano Delferro<sup>c,e</sup>

<sup>a</sup>Chemical and Biological Sciences Division, Ames National laboratory, Ames, IA 50011, United States

<sup>b</sup>Department of Chemistry, Iowa State University, Ames, IA 50011, United States

<sup>c</sup>Chemical Sciences and Engineering Division, Argonne National Laboratory, Lemont, Illinois 60439, United States

<sup>d</sup>Department of Chemistry and Chemical Biology, Baker Laboratory, Cornell University, Ithaca, New York 14853, United States

<sup>e</sup>Pritzker School of Molecular Engineering, University of Chicago, Chicago, Illinois 60637, United States

\*fperras@ameslab.gov

## 1. Experimental

### 1.1. Synthesis.

Air- and moisture-sensitive synthetic procedures were conducted using standard Schlenk line techniques or in a glovebox under nitrogen atmosphere. Solvents for air- and moisture-sensitive procedures were dried over activated alumina. All reagents were used without further purification. Ir-POCOP was synthesized according to previous reported procedure.<sup>1,2</sup> All gases, including ultra-high purity ethylene, were purchased from Airgas.

#### *1.1.1. <sup>17</sup>O-Enriched Silica.*

Davisil silica gel, grade 646, 35-50 mesh, pore size 150 Å, was purchased from Aldrich. Approximately 300 mg of the silica gel was dried at 700 °C overnight under dynamic vacuum in a tube furnace. Following this, the tube was inserted into a wet box and 100 µL of 90% <sup>17</sup>O-enriched water (Cortecnet) was added to the tube. The mixture was left to react at room temperature for 6 hours. This procedure was repeated for a total of 5 times. Prior to grafting the sample was dried once more at 700 °C under dynamic vacuum.

#### *1.1.2. Sc{κ<sup>2</sup>-(NiPr)<sub>2</sub>CH<sub>2</sub>}/Si<sup>17</sup>O<sub>2</sub>.*

The title compound was prepared in accordance with our earlier studies.<sup>3,4</sup> Briefly, in a glovebox, Sc{κ<sup>2</sup>-(NiPr)<sub>2</sub>CH<sub>2</sub>}<sub>3</sub> (50 mg) was dissolved into anhydrous pentane (3 mL) and added to a suspension of the Si<sup>17</sup>O<sub>2</sub> support (100 mg). The mixture was stirred at room temperature for 4 h after which the supernatant was removed by decanting and the solid was washed with pentane (3 x 5 mL). The resulting solid was then dried overnight at room temperature under dynamic vacuum.

#### *1.1.3. Ir(C<sub>2</sub>H<sub>4</sub>)(<sup>t</sup>Bu<sup>4</sup>POCOP)/Si<sup>17</sup>O<sub>2</sub>*

To an oven-dried 20 mL glass scintillation vial in a glovebox under nitrogen atmosphere was added Ir(C<sub>2</sub>H<sub>4</sub>)(<sup>t</sup>Bu<sup>4</sup>POCOP) (10.0 mg, 0.013 mmol). In another oven-dried 20 mL glass scintillation vial was added 300 mg of Si<sup>17</sup>O<sub>2</sub>. To this was added 1 mL of toluene. 3 mL of toluene were used to rinse Ir(C<sub>2</sub>H<sub>4</sub>)(<sup>t</sup>Bu<sup>4</sup>POCOP) into the vial Si<sup>17</sup>O<sub>2</sub>. The reaction mixture was sealed with a Teflon cap and shaken on a shaker table (440 rpm) at room temperature for 1 h. It was then filtered on a disposable frit and washed with copious amounts of benzene then pentane, until the filtrate ran clear. The material was dried under reduced pressure to obtain an orange powder. Ir wt % = 2.08 ± 0.16 (by ICP-MS).

### 1.2. Solid State NMR Spectroscopy.

All solid-state NMR experiments were performed using a Bruker AVANCE III 400 MAS-DNP spectrometer equipped with a triple-resonance 3.2 mm low-temperature MAS probe and a 264 GHz gyrotron. Samples were impregnated with 16 mM solutions of TEKPol,<sup>5</sup> dissolved in dry 1,1,2,2-tetrachloroethane, in a glovebox and packed into 3.2 mm sapphire rotors. Rotors were inserted into a pre-cooled (100 K) NMR probe and spun to a frequency of 10 kHz.

Both the <sup>13</sup>C and <sup>31</sup>P-based experiments were performed using a ramped cross-polarization pulse sequence employing a 2 ms contact time. Dipolar recoupling was achieved using the REDOR pulse sequence<sup>6</sup> with the <sup>13</sup>C and <sup>31</sup>P inversion pulses lasting 8 and 10 µs respectively. For recoupling to

$^{17}\text{O}$  a phase-modulated  $^{17}\text{O}$  saturation pulse lasting 10 rotor periods (1 ms) was applied (i.e. PM-RESPDOR).<sup>7,8</sup>  $^{13}\text{C}\{^{17}\text{O}\}$  PM-RESPDOR recoupling was incremented in 400  $\mu\text{s}$  increments from 0 to 2 ms and then 1.2 ms increments from 2.6 to 10 ms.  $^{31}\text{P}\{^{17}\text{O}\}$  PM-RESPDOR recoupling was incremented uniformly in 800  $\mu\text{s}$  increments. Each subspectrum was acquired in 512 scans with a 4 s recycle delay for the Sc complex and 1024 scans and a 1.8 s recycle delay for the Ir complex.

$^{17}\text{O}$  DNP-enhanced NMR spectra were acquired using the RINEPT-SR412(tt)-QCPMG pulse sequence.<sup>9</sup> The MAS frequency was increased to 12.5 kHz, the effective  $^{17}\text{O}$  radiofrequency power was set to 25 kHz, and the QCPMG frequency (spikelet separation) was set to 625 Hz. The  $^1\text{H}$  radiofrequency powers were set to 80 kHz for the CW decoupling pulses, 100 kHz for the hard pulses, and 132 kHz for the tanh/tan adiabatic SR4<sub>1</sub><sup>2</sup> pulses. The total dipolar recoupling time lasted 2.56 ms. For the 1D spectral acquisitions the recycle delays were set to 4 s while this was reduced to 1 s for the HETCOR spectrum acquisition. 1D spectra were acquired in 64 and 128 scans for the Sc and Ir complexes, respectively. The HETCOR spectrum was acquired in 24 scans for each of the 96  $t_1$  increments of 32.67  $\mu\text{s}$ . 100 kHz of frequency-switched Lee-Goldburg homonuclear decoupling<sup>10</sup> was applied during  $t_1$  for resolution enhancement.

### 1.3. Density Functional Theory.

We carried out first-principles density functional theory (DFT) calculations on the Ir(POCOP) complex grafted to amorphous silica using the Quantum Espresso (QE) package (<http://www.quantum-espresso.org>), version 7.1.<sup>11,12,13</sup> Geometry optimizations were carried out with projector augmented wave (PAW) pseudopotentials available from the QE pseudopotential library, implemented with the Perdew, Burke, and Ernzerhof (PBE) functional.<sup>14</sup> The initial structural coordinates were obtained by grafting the Ir complex in both orientations (see main text) onto a periodic amorphous silica model.<sup>15</sup> For all calculations, the plane-wave cutoff energy was converged to 44 Rydberg with a 1x1x1  $k$ -point grid, owing to the large unit cell.

The gauge-including projector augmented wave (GIPAW) method<sup>16,17</sup>, implemented in QE-GIPAW, version 7.1<sup>18</sup>, was used to calculate the NMR magnetic shieldings and electric field gradients. GIPAW pseudopotentials files for each atom were obtained from the distribution of QE-GIPAW except for iridium, which was obtained from ref 19. The computed NMR parameters were extracted using MagresView, version 1.6.2.<sup>20</sup> To convert the calculated magnetic shielding constants to chemical shifts, we used the following equation,  $\delta_{iso} \approx \sigma_{ref} - \sigma_{iso}$  where  $\sigma_{ref}$  is the absolute magnetic shielding reference ( $^{13}\text{C}$ : 186.40 ppm<sup>21</sup>;  $^{17}\text{O}$ : 287.50 ppm<sup>22</sup>;  $^{31}\text{P}$ : 328.35 ppm<sup>23</sup>)

## 2. Supplementary Tables and Figures

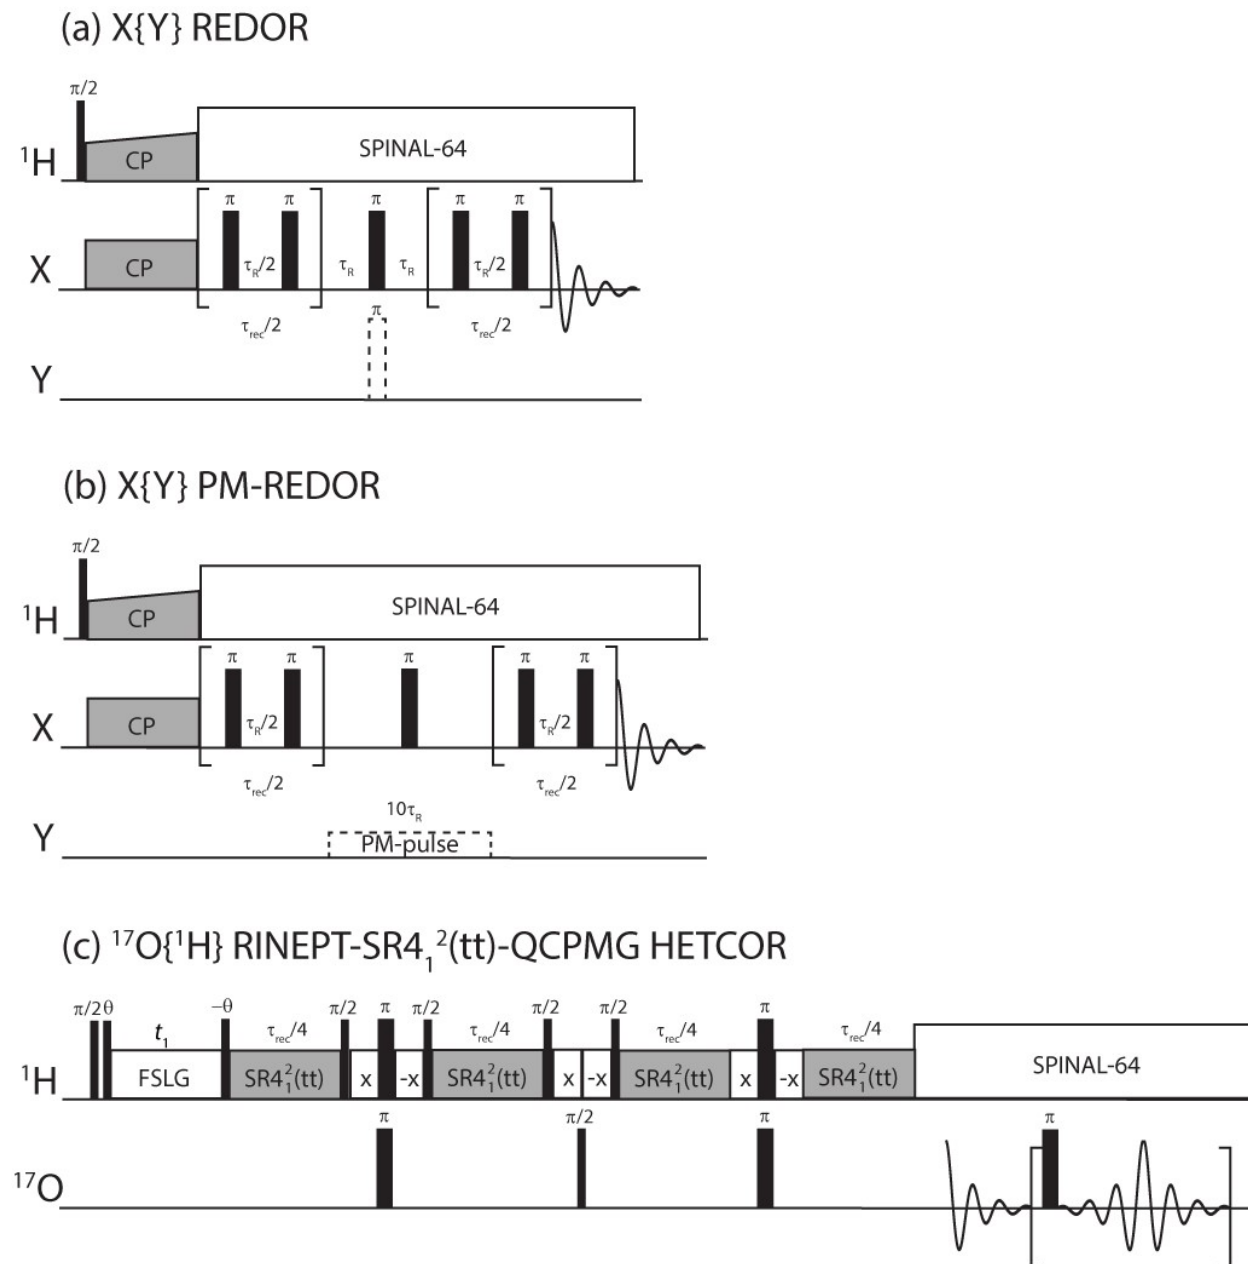

**Figure S1.** Pulse sequence diagrams for the sequences used in this study. For the phase cycling of the RINEPT-SR4<sub>1</sub><sup>2</sup>(tt)-QCPMG HETCOR pulse sequence, please refer to the original publication.<sup>9</sup>

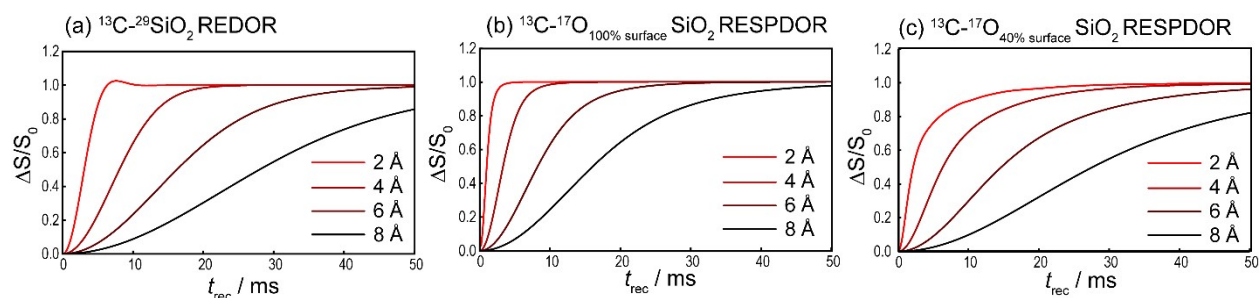

**Figure S2.** Comparisons of simulated  $^{13}\text{C}\{^{29}\text{Si}\}$  REDOR (a) and  $^{13}\text{C}\{^{17}\text{O}\}$  RESPDOR (b,c) data from atoms situated at distances of 2, 4, 6, and 8 Å above an amorphous silica surface that is enriched to 100% in  $^{29}\text{Si}$  (a), 100 % in  $^{17}\text{O}$  (b) and 40% in  $^{17}\text{O}$  (c). Comparative dephasing is observed with 40%  $^{17}\text{O}$  as is obtained with 100 %  $^{29}\text{Si}$ .

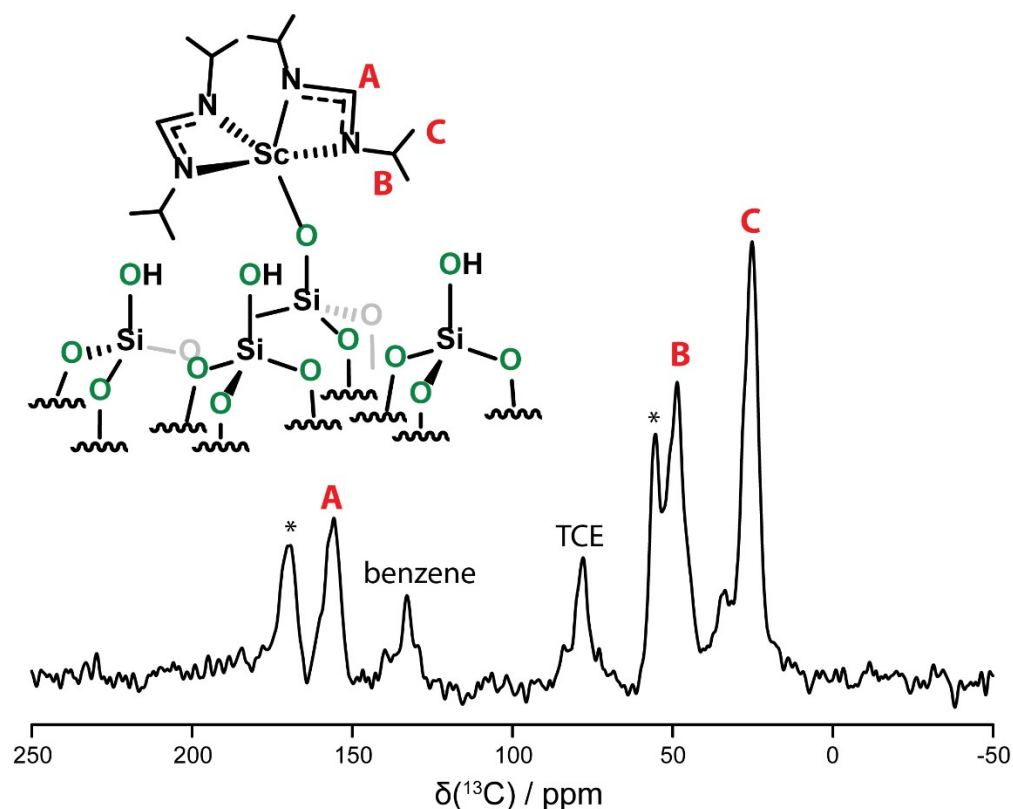

**Figure S3.** DNP-enhanced  $^{13}\text{C}$  CPMAS NMR spectrum acquired on the Sc amidinate complex. The sites are labeled according to the structure on the top. Asterisks denote the positions of resonances from degradation products (free ligand).

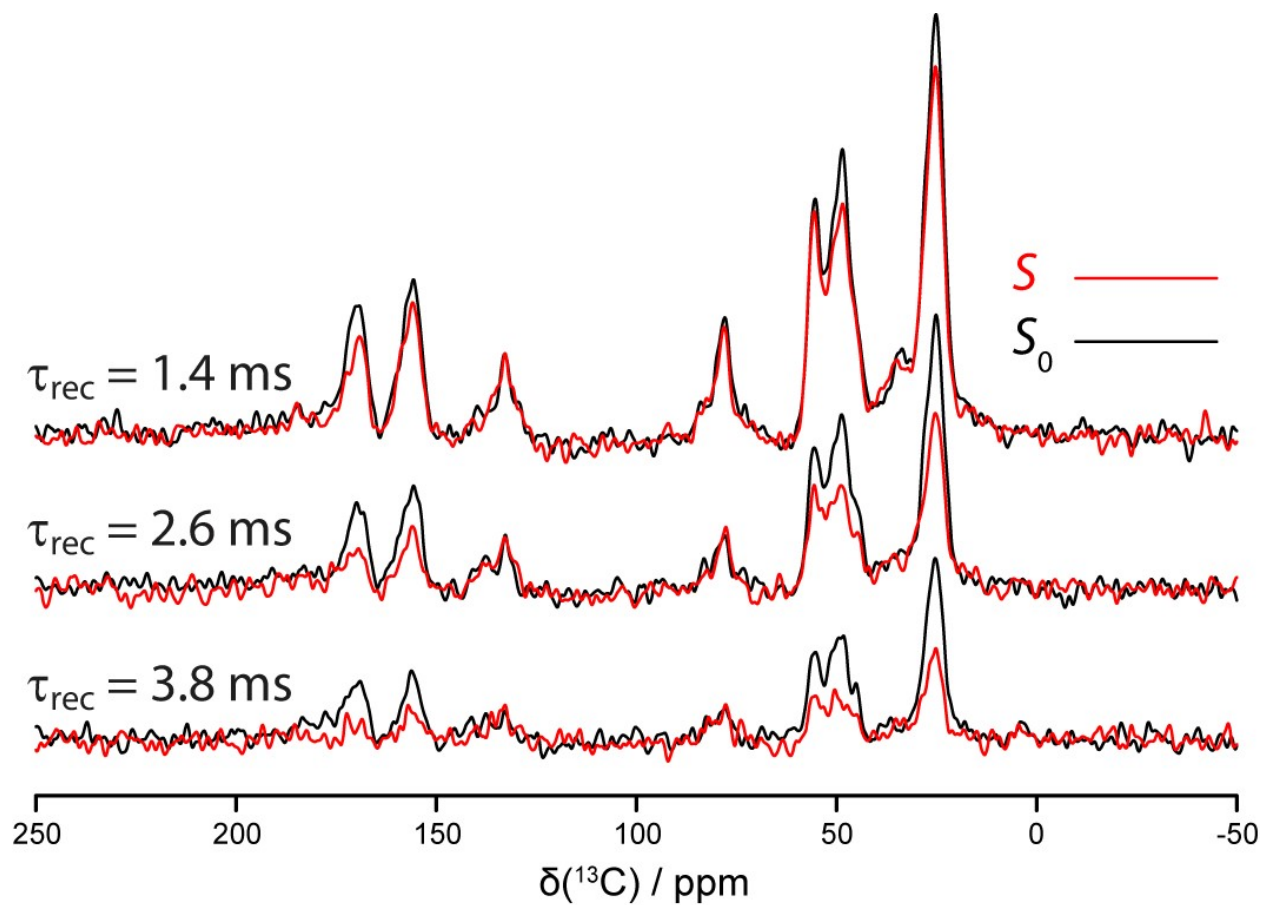

**Figure S4.** DNP-enhanced  $^{13}\text{C}\{^{17}\text{O}\}$  PM-RESPDOR NMR subspectra acquired on the Sc amidinate complex. The reference signal intensity ( $S_0$ ) is shown in black while the dephased signal ( $S$ ) is shown in red.

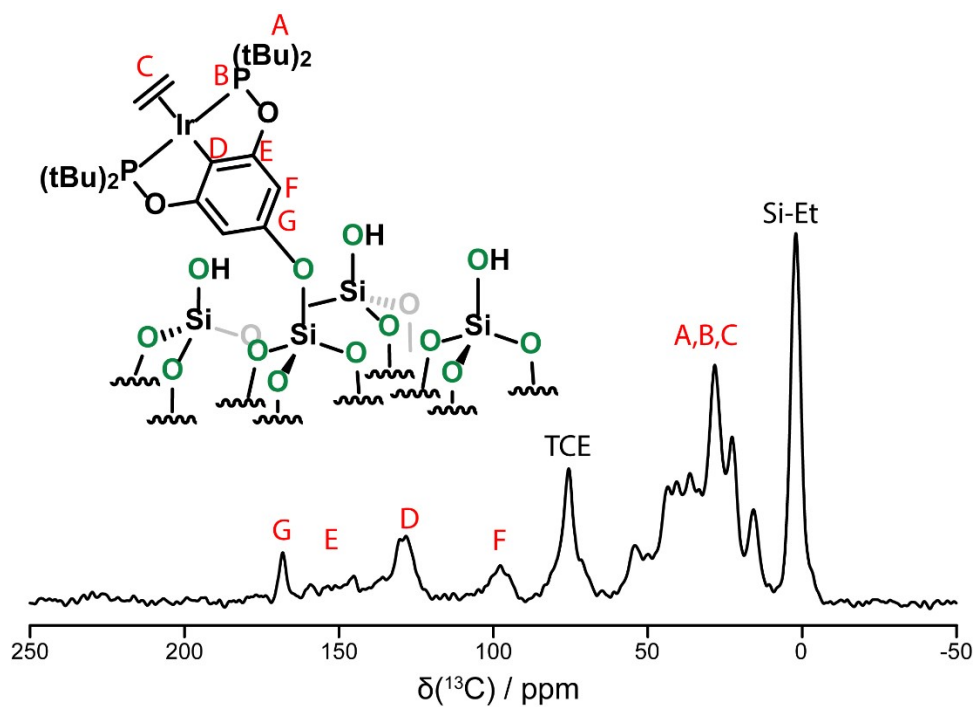

**Figure S5.** DNP-enhanced  $^{13}\text{C}$  CPMAS NMR spectrum acquired on the Ir(POCOP) complex. The sites are labeled according to the structure on the top. An impurity from Si-bound carbon is observed near 0 ppm, presumably due to the insertion of some ethylene into the support.

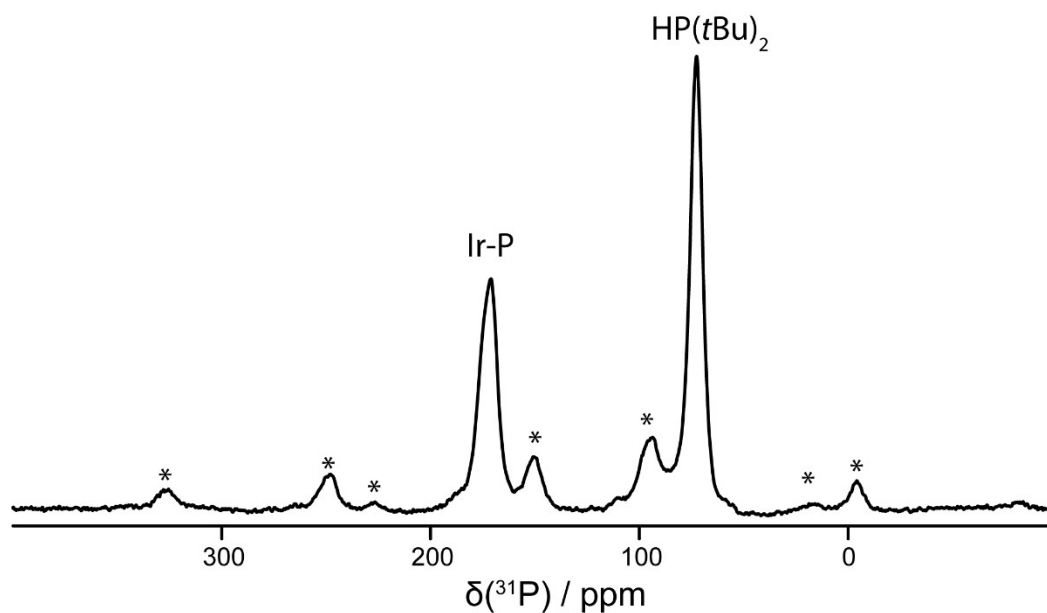

**Figure S6.** DNP-enhanced  $^{31}\text{P}$  CPMAS NMR spectrum acquired on the Ir(POCOP) complex. A resonance is observed at a lower chemical shift corresponding to free phosphine.

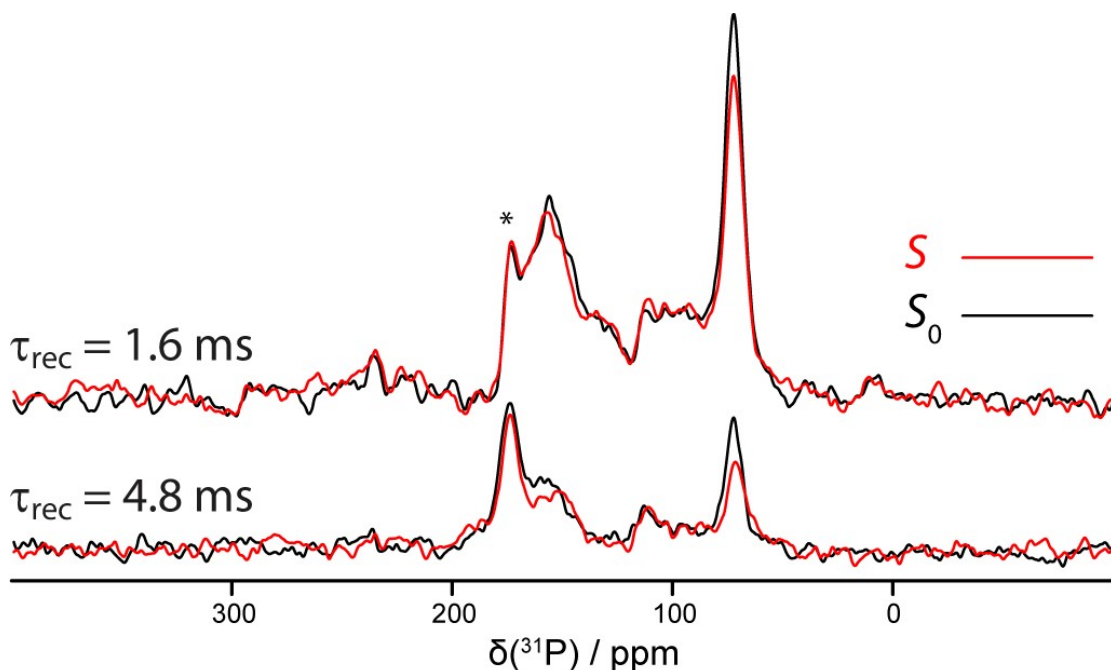

**Figure S7.** DNP-enhanced  $^{13}\text{C}\{^{17}\text{O}\}$  PM-RESPDOR NMR subspectra acquired on the Ir(POCOP) complex. The reference signal intensity ( $S_0$ ) is shown in black while the dephased signal ( $S$ ) is shown in red.

**Table S1.** GIPAW DFT calculated NMR parameters for the Ir and *para*-substituent grafted Ir(POCOP) complex.<sup>a</sup>

| Atom                   | <i>Para</i> -grafted               |                                               | <i>Para</i> -grafted |          |                                      | Ir-grafted           |          |                                      |
|------------------------|------------------------------------|-----------------------------------------------|----------------------|----------|--------------------------------------|----------------------|----------|--------------------------------------|
|                        | $\delta_{\text{iso}} / \text{ppm}$ | Ir-grafted $\delta_{\text{iso}} / \text{ppm}$ | $ C_Q  / \text{MHz}$ | $\eta_Q$ | $\delta_{\text{obs}} / \text{ppm}^b$ | $ C_Q  / \text{MHz}$ | $\eta_Q$ | $\delta_{\text{obs}} / \text{ppm}^b$ |
| C(A)                   | 43.0                               | 42.2                                          |                      |          |                                      |                      |          |                                      |
| C(B)                   | 65.5                               | 62.1                                          |                      |          |                                      |                      |          |                                      |
| C(C)                   | 57.3                               |                                               |                      |          |                                      |                      |          |                                      |
| C(D)                   | 167.8                              | 171.1                                         |                      |          |                                      |                      |          |                                      |
| C(E)                   | 186.8                              | 185.2                                         |                      |          |                                      |                      |          |                                      |
| C(F)                   | 113.9                              | 116.3                                         |                      |          |                                      |                      |          |                                      |
| C(G)                   | 173.5                              | 180.9                                         |                      |          |                                      |                      |          |                                      |
| P(B)                   | 239.1                              | 229.1                                         |                      |          |                                      |                      |          |                                      |
| P(G)                   |                                    | 246.4                                         |                      |          |                                      |                      |          |                                      |
| O(linker) <sup>c</sup> | 98.4                               | 96.6                                          |                      |          |                                      |                      |          |                                      |

<sup>a</sup>The average of the NMR parameters calculated for structurally equivalent nuclei is presented.

<sup>b</sup>Expected resonance frequency at 54.3 MHz (9.4 T) when accounting for the quadrupole-induced shift.

<sup>c</sup>A lower  $^{17}\text{O}$   $C_Q$  value is predicted for a Si-O-Ir oxygen than a Si-O-C oxygen due to the decreased covalency leading to an electronic configuration that more closely resembles the spherically-symmetric  $[\text{He}]2s^22p^6$  configuration. Covalent, organic,  $^{17}\text{O}$  sites generally have  $C_Q$  values around 9 MHz<sup>24</sup> while inorganic oxides have far lower  $C_Q$  values, with them being largely correlated to covalency.



### 3. Structure Determination

$^{13}\text{C}\{^{17}\text{O}\}$  PM-RESPDOR data acquired for the Sc complex was analyzed using the INTERFACES program.<sup>25</sup> Standard RESPDOR dephasing curves were calculated using an amorphous silica model of Comas-Vives<sup>26</sup> that has been surface- $^{17}\text{O}$ -enriched to a level of 80%. The potential  $^{17}\text{O}$  positions are listed below in XYZ format and were used with the “library\_maker.c” program available at <https://github.com/fperras/INTERFACES/>.

```
O 9.05432 12.41696 -0.05485
O 12.17241 13.01559 0.05005
O 13.03848 10.5663 -0.51512
O 5.79973 15.11999 -0.6108
O 8.26442 15.9683 0.2455
O 4.7548 12.35363 0.25336
O 6.54277 10.37054 0.80931
O 10.84037 8.46746 -0.03708
O 9.41483 6.74966 1.56002
O 2.29011 5.99506 1.09463
O 11.95868 15.47044 -1.10763
O 12.64203 5.42318 0.8076
O 8.08599 2.86349 -0.51615
O 15.48584 2.57038 1.77324
O 18.90838 2.65725 0.56294
O 18.73102 15.77938 0.51374
O 16.2475 16.25349 1.47323
O 19.11442 12.1784 0.53048
O 16.84249 8.38594 0.35963
O 19.21048 8.94457 1.62016
O 0.36671 11.32646 1.01296
O 0.48117 8.72184 0.39414
O 21.87607 8.72184 0.39414
O 21.52584 16.4362 -1.2385
O 2.19918 16.25328 0.51305
O 3.81578 18.74279 0.69381
O 21.87521 2.55969 0.2168
O 0.74326 21.23508 0.67775
O 12.28067 19.29157 0.03501
O 10.36134 17.78729 1.17219
O 6.96297 19.01771 -0.32035
O 16.07335 0.47133 0.20655
O 16.07335 21.86623 0.20655
O 10.85684 0.83098 -0.13891
O -0.9709 5.15125 0.54244
O 20.424 5.15125 0.54244
```

The initial guess structure given to INTERFACES is described by this MOL2 file:

```
@<TRIPOS>MOLECULE
*****
 21 22 0 0 0
SMALL
GASTEIGER
```

```

@<TRIPOS>ATOM
  1 Sc      0.1998   0.2622   3.0205 Sc      1 UNL11      0.0000
  2 N       1.4236  -1.6838   2.8319 N.3     1 UNL11      0.0000
  3 N      -0.8232  -1.6093   2.6519 N.3     1 UNL11      0.0000
  4 C       0.2806  -2.3523   2.7318 C.3     1 UNL11      0.0000
  5 C       2.7064  -2.3824   2.8979 C.3     1 UNL11      0.0000
  6 C      -2.1889  -2.1331   2.6525 C.3     1 UNL11      0.0000
  7 C       2.5491  -3.8350   3.3673 C.3     1 UNL11      0.0000
  8 C       3.6237  -1.6079   3.8421 C.3     1 UNL11      0.0000
  9 C      -2.2169  -3.5684   3.1899 C.3     1 UNL11      0.0000
 10 C      -3.2175  -1.2454   3.3614 C.3     1 UNL11      0.0000
 11 N      -0.9111   1.1829   4.6146 N.3     1 UNL11      0.0000
 12 N       1.3332   1.3033   4.5053 N.3     1 UNL11      0.0000
 13 C       0.2160   1.6128   5.1632 C.3     1 UNL11      0.0000
 14 C      -2.2756   1.4819   5.0257 C.3     1 UNL11      0.0000
 15 C       2.6803   1.5358   5.0090 C.3     1 UNL11      0.0000
 16 C      -2.6486   2.9611   4.9385 C.3     1 UNL11      0.0000
 17 C      -2.4499   0.9351   6.4472 C.3     1 UNL11      0.0000
 18 C       2.8870   0.9271   6.3966 C.3     1 UNL11      0.0000
 19 C       2.9048   3.0481   5.0186 C.3     1 UNL11      0.0000
 20 Si      0.0000   0.0000   0.0000 Si      1 UNL11      0.0000
 21 O       0.3867   0.9535   1.2185 O.3     1 UNL1      0.0000
@<TRIPOS>BOND
  1     9     6     1
  2     6    10     1
  3     6     3     1
  4    16    14     1
  5    19    15     1
  6     1    12     1
  7     1    11     1
  8     3     4     1
  9    12    15     1
 10    12    13     1
 11    11    14     1
 12    11    13     1
 13    15    18     1
 14    14    17     1
 15     4     2     1
 16     2     5     1
 17     5     7     1
 18     5     8     1
 19     3     1     1
 20     2     1     1
 21     1    21     1
 22    21    20     1

```

And the INTERFACES input file is given below, together with the three experimental PM-RESPDOR datasets. All four N-*i*Pr dihedral angles were sampled in addition to the Sc-amidine dihedrals. The complex's orientation relative to the support was also sampled using a ghost atom.

```

//information on the structure
structure Sc_amidine_SiO.mol2

```

```

support SiO2_80p_17OH
confidence_level 90
cutoff_rmsd 1.5
max_structures 10000

//Structural variables
bend 20 21 1 -40 40 9
revolve 21 1 9
revolve 1 4 4
revolve 1 13 4
revolve 2 5 4
revolve 3 6 4
revolve 11 14 4
revolve 12 15 4

//Constraints
surface_collision_distance 1.2

//REDOR data
surface-REDOR SiO2-methyls.txt 1.0
detected_spins 7 8 9 10 16 17 18 19

surface-REDOR SiO2-iPr.txt 1.0
detected_spins 5 6 14 15

surface-REDOR SiO2-CH.txt 1.0
detected_spins 4 13

```

### **SiO2-CH.txt**

```

0.0008    0.047865738
0.0012    0.126796001
0.0014    0.128778195
0.0016    0.214027892
0.002     0.294988722
0.0026    0.430198384
0.0038    0.49691358
0.005     0.632037262
0.0062    0.656279509

```

### **SiO2-iPr.txt**

```

0.0008    0.031154661
0.0012    0.08350182
0.0014    0.111144264
0.0016    0.145746165
0.002     0.269090488
0.0026    0.332789949
0.0038    0.508944894
0.005     0.569281945
0.0062    0.575598488
0.0074    0.562953995

```

### **SiO2-methyls.txt**

```

0.0012    0.110686831

```

```
0.0014    0.122672406
0.0016    0.1485
0.0020    0.204278151
0.0026    0.334637632
0.0038    0.49707067
0.0050    0.573601629
0.0062    0.73518983
0.0074    0.808431402
0.0086    0.969162996
0.0098    0.775917579
```

The resulting best-fit structure is given by the following MOL2 file.

```
@<TRIPOS>MOLECULE
```

```
*****
```

```
 26 26 0 0 0
```

```
SMALL
```

```
GASTEIGER
```

```
@<TRIPOS>ATOM
```

```
1 Sc 0.2265 1.5089 3.0574 Sc      1 UNL1      0.0000
2 N -0.2913 3.7493 2.8776 N.3    1 UNL1      0.0000
3 N 1.8198 2.9572 2.8371 N.3    1 UNL1      0.0000
4 C 1.0098 4.0149 2.8796 C.3    1 UNL1      0.0000
5 C -1.2836 4.8232 2.8930 C.3    1 UNL1      0.0000
6 C 3.2774 3.0119 2.9472 C.3    1 UNL1      0.0000
7 C -0.7042 6.1368 3.4349 C.3    1 UNL1      0.0000
8 C -2.4681 4.3664 3.7422 C.3    1 UNL1      0.0000
9 C 3.7375 2.4670 4.3041 C.3    1 UNL1      0.0000
10 C 4.0346 2.3534 1.7890 C.3    1 UNL1      0.0000
11 N -1.2876 0.8652 4.4417 N.3   1 UNL1      0.0000
12 N 0.8689 0.2667 4.6752 N.3   1 UNL1      0.0000
13 C -0.3806 0.1905 5.1332 C.3   1 UNL1      0.0000
14 C -2.6887 1.0786 4.7756 C.3   1 UNL1      0.0000
15 C 1.9851 -0.5192 5.1843 C.3   1 UNL1      0.0000
16 C -2.9148 1.8550 6.0721 C.3   1 UNL1      0.0000
17 C -3.3594 -0.2994 4.8145 C.3   1 UNL1      0.0000
18 C 3.1690 0.3605 5.5883 C.3    1 UNL1      0.0000
19 C 2.3716 -1.5163 4.0917 C.3   1 UNL1      0.0000
20 Si -0.4247 0.0000 0.0000 Si    1 UNL1      0.0000
21 O -0.0380 0.9535 1.2185 O.3   1 UNL1      0.0000
22 Si 0.0000 0.0000 0.0000 Si 1 UNL1 0.0000
23 Si 50.0000 50.0000 0.0000 Si 1 UNL1 0.0000
24 Si -50.0000 -50.0000 0.0000 Si 1 UNL1 0.0000
25 Si -50.0000 50.0000 0.0000 Si 1 UNL1 0.0000
26 Si 50.0000 -50.0000 0.0000 Si 1 UNL1 0.0000
```

```
@<TRIPOS>BOND
```

```
1 9 6 1
2 6 10 1
3 6 3 1
4 16 14 1
5 19 15 1
```

```

6 1 12 1
7 1 11 1
8 3 4 1
9 12 15 1
10 12 13 1
11 11 14 1
12 11 13 1
13 15 18 1
14 14 17 1
15 4 2 1
16 2 5 1
17 5 7 1
18 5 8 1
19 3 1 1
20 2 1 1
21 1 21 1
22 21 20 1
23 22 23 1
24 22 24 1
25 22 25 1
26 22 26 1

```

#### 4. DFT-Optimized Structures

##### 4.1. C-bound Ir(C<sub>2</sub>H<sub>4</sub>)(<sup>t</sup>Bu<sup>4</sup>POCOP)/Si<sup>17</sup>O<sub>2</sub>

```

data_SiO2-9_IrPOCOP_C-bound
_symmetry_space_group_name_H-M      'P1'
_symmetry_Int_Tables_number         1
loop_
_symmetry_equiv_pos_as_xyz
  x, y, z
_cell_length_a                       21.3949
_cell_length_b                       21.3949
_cell_length_c                       34.1700
_cell_angle_alpha                   90.0000
_cell_angle_beta                    90.0000
_cell_angle_gamma                   90.0000
loop_
_atom_site_label
_atom_site_type_symbol
_atom_site_fract_x
_atom_site_fract_y
_atom_site_fract_z
O1      O      0.28735   0.70663   0.08580
O2      O      0.61144   0.61639   0.19966
O3      O      0.15845   0.39231   0.09335
O4      O      0.38526   0.43077   0.15737
O5      O      0.67522   0.84509   0.14258
O6      O      0.05962   0.48344   0.34325
O7      O      0.63825   0.13208   0.19149
Si8     Si      0.35879   0.38763   0.12090
Si9     Si      0.22791   0.65772   0.08674
Si10    Si      0.31000   0.71337   0.31764

```

|      |    |          |         |         |
|------|----|----------|---------|---------|
| Si11 | Si | 0.35839  | 0.72375 | 0.09976 |
| Si12 | Si | 0.26626  | 0.83559 | 0.29005 |
| Si13 | Si | 0.44788  | 0.57210 | 0.23455 |
| O14  | O  | 0.19977  | 0.92020 | 0.19354 |
| O15  | O  | 0.85351  | 0.51976 | 0.09042 |
| O16  | O  | 0.40171  | 0.76219 | 0.20949 |
| O17  | O  | 0.52230  | 0.55540 | 0.24051 |
| O18  | O  | 0.11019  | 0.51779 | 0.20736 |
| O19  | O  | 0.60172  | 0.62196 | 0.34939 |
| O20  | O  | 0.43568  | 0.64711 | 0.23046 |
| O21  | O  | 0.10917  | 0.44547 | 0.27624 |
| Si22 | Si | 0.61607  | 0.17786 | 0.22784 |
| O23  | O  | 0.51745  | 0.74079 | 0.23672 |
| O24  | O  | 0.30951  | 0.97299 | 0.20178 |
| O25  | O  | 0.31264  | 0.84921 | 0.18918 |
| O26  | O  | 0.78707  | 0.87279 | 0.23499 |
| O27  | O  | 0.99298  | 0.26993 | 0.32631 |
| O28  | O  | 0.97345  | 0.00346 | 0.28939 |
| O29  | O  | -0.00099 | 0.03270 | 0.16632 |
| O30  | O  | 0.10409  | 0.29707 | 0.12676 |
| Si31 | Si | 0.90753  | 0.01977 | 0.26706 |
| Si32 | Si | 0.03391  | 0.76405 | 0.30769 |
| Si33 | Si | 0.88341  | 0.76188 | 0.31585 |
| O34  | O  | 0.58529  | 0.71132 | 0.29975 |
| O35  | O  | 0.79235  | 0.33029 | 0.15957 |
| O36  | O  | 0.05429  | 0.21634 | 0.26621 |
| O37  | O  | 0.52616  | 0.68472 | 0.09212 |
| Si38 | Si | 0.81714  | 0.52966 | 0.13286 |
| Si39 | Si | 0.41797  | 0.83751 | 0.06409 |
| Si40 | Si | 0.53333  | 0.38628 | 0.15975 |
| Si41 | Si | 0.43352  | 0.23735 | 0.34218 |
| Si42 | Si | 0.65623  | 0.66717 | 0.17614 |
| Si43 | Si | 0.46011  | 0.71146 | 0.21001 |
| Si44 | Si | 0.76228  | 0.40228 | 0.15617 |
| O45  | O  | 0.14043  | 0.60551 | 0.25535 |
| O46  | O  | 0.54282  | 0.16457 | 0.23992 |
| O47  | O  | 0.71931  | 0.41890 | 0.19497 |
| O48  | O  | 0.50923  | 0.94533 | 0.13254 |
| O49  | O  | 0.25015  | 0.86064 | 0.10458 |
| O50  | O  | 0.62941  | 0.73882 | 0.17618 |
| O51  | O  | 0.72390  | 0.88958 | 0.07435 |
| O52  | O  | 0.70359  | 0.83313 | 0.28503 |
| O53  | O  | 0.72729  | 0.66420 | 0.19370 |
| Si54 | Si | 0.85367  | 0.78307 | 0.11521 |
| Si55 | Si | 0.84885  | 0.91474 | 0.22570 |
| O56  | O  | 0.21820  | 0.28551 | 0.17699 |
| O57  | O  | 0.12077  | 0.06510 | 0.10914 |
| O58  | O  | 0.60280  | 0.15999 | 0.33178 |
| O59  | O  | 0.84120  | 0.69655 | 0.31836 |
| O60  | O  | 0.19352  | 0.27581 | 0.25303 |
| O61  | O  | 0.61530  | 0.52880 | 0.12696 |
| O62  | O  | 0.33204  | 0.47172 | 0.22538 |
| O63  | O  | 0.32262  | 0.32720 | 0.13892 |

|       |    |          |         |         |
|-------|----|----------|---------|---------|
| O64   | O  | 0.29925  | 0.96769 | 0.12334 |
| O65   | O  | 0.49647  | 0.57895 | 0.12714 |
| O66   | O  | 0.85067  | 0.45847 | 0.30472 |
| O67   | O  | 0.62272  | 0.04989 | 0.29846 |
| Si68  | Si | 0.65234  | 0.11999 | 0.30453 |
| Si69  | Si | 0.76927  | 1.00102 | 0.17269 |
| Si70  | Si | 0.59901  | 0.56582 | 0.23570 |
| Si71  | Si | 0.63370  | 0.65140 | 0.31032 |
| Si72  | Si | 0.95704  | 0.08443 | 0.18999 |
| Si73  | Si | 0.32690  | 0.14099 | 0.12525 |
| Si74  | Si | 0.27103  | 0.90579 | 0.20865 |
| O75   | O  | 0.45595  | 0.13903 | 0.18413 |
| O76   | O  | 0.46555  | 0.78421 | 0.30229 |
| O77   | O  | 0.41461  | 0.23716 | 0.38892 |
| O78   | O  | 0.08464  | 0.82304 | 0.29672 |
| O79   | O  | 0.31039  | 0.39726 | 0.28697 |
| O80   | O  | 0.83661  | 0.13154 | 0.35598 |
| O81   | O  | 0.48353  | 0.69270 | 0.16558 |
| O82   | O  | 0.98879  | 0.90384 | 0.15896 |
| O83   | O  | 0.95519  | 0.75918 | 0.29371 |
| O84   | O  | 0.62895  | 0.59833 | 0.27514 |
| Si85  | Si | 0.73583  | 0.87788 | 0.12138 |
| Si86  | Si | 0.78111  | 0.68288 | 0.22507 |
| Si87  | Si | 0.95043  | 0.84330 | 0.17523 |
| O88   | O  | 0.79318  | 0.82699 | 0.12638 |
| O89   | O  | 0.89135  | 0.32721 | 0.29808 |
| O90   | O  | 0.81596  | 0.45995 | 0.15445 |
| O91   | O  | 0.62312  | 0.25485 | 0.22271 |
| O92   | O  | 0.91329  | 0.81493 | 0.13742 |
| O93   | O  | 0.86958  | 0.07411 | 0.29141 |
| Si94  | Si | 0.76682  | 0.16459 | 0.35000 |
| Si95  | Si | 0.13302  | 0.87396 | 0.31938 |
| Si96  | Si | 0.08144  | 0.02355 | 0.07691 |
| O97   | O  | 0.43713  | 0.90010 | 0.32219 |
| O98   | O  | 0.07897  | 0.05477 | 0.30901 |
| O99   | O  | 0.03267  | 0.42424 | 0.21132 |
| O100  | O  | 0.57580  | 0.82901 | 0.28241 |
| O101  | O  | -0.00224 | 0.13759 | 0.21341 |
| O102  | O  | 0.22336  | 0.28580 | 0.10028 |
| Si103 | Si | 0.46785  | 0.31892 | 0.22966 |
| Si104 | Si | 0.04956  | 0.27918 | 0.29427 |
| Si105 | Si | 0.46946  | 0.17059 | 0.22623 |
| Si106 | Si | 0.20005  | 0.32464 | 0.21620 |
| Si107 | Si | 0.07253  | 0.64605 | 0.25764 |
| Si108 | Si | 0.13599  | 0.14002 | 0.11478 |
| O109  | O  | 0.43155  | 0.86033 | 0.16568 |
| O110  | O  | 0.40777  | 0.00065 | 0.15747 |
| O111  | O  | 0.11958  | 0.13893 | 0.22091 |
| O112  | O  | 0.09661  | 0.95495 | 0.16753 |
| O113  | O  | 0.25224  | 0.87935 | 0.25204 |
| O114  | O  | 0.35341  | 0.76865 | 0.13832 |
| O115  | O  | 0.59183  | 0.02512 | 0.22266 |
| O116  | O  | 0.31408  | 0.08168 | 0.15569 |

|       |    |         |         |         |
|-------|----|---------|---------|---------|
| Si117 | Si | 0.04083 | 0.49450 | 0.19353 |
| O118  | O  | 0.40689 | 0.35098 | 0.25053 |
| O119  | O  | 0.51359 | 0.20416 | 0.12934 |
| O120  | O  | 0.68490 | 0.32890 | 0.05586 |
| O121  | O  | 0.84675 | 0.70839 | 0.12867 |
| O122  | O  | 0.85027 | 0.68436 | 0.20483 |
| O123  | O  | 0.61734 | 0.24906 | 0.09969 |
| O124  | O  | 0.38875 | 0.76642 | 0.06411 |
| Si125 | Si | 0.37485 | 0.81057 | 0.17577 |
| O126  | O  | 0.41956 | 0.03676 | 0.31183 |
| O127  | O  | 0.27089 | 0.59180 | 0.27261 |
| O128  | O  | 0.24131 | 0.12872 | 0.22725 |
| Si129 | Si | 0.46653 | 0.97345 | 0.31869 |
| Si130 | Si | 0.63910 | 0.86000 | 0.26358 |
| Si131 | Si | 0.26577 | 0.27573 | 0.13967 |
| Si132 | Si | 0.64592 | 0.05091 | 0.09704 |
| Si133 | Si | 0.59120 | 0.99772 | 0.26854 |
| Si134 | Si | 0.16485 | 0.46748 | 0.09054 |
| Si135 | Si | 0.53999 | 0.51681 | 0.11626 |
| Si136 | Si | 0.46264 | 0.00637 | 0.12394 |
| O137  | O  | 0.74313 | 0.54831 | 0.12674 |
| O138  | O  | 0.62929 | 0.03726 | 0.14367 |
| O139  | O  | 0.82811 | 0.96625 | 0.19341 |
| O140  | O  | 0.16536 | 0.40978 | 0.33975 |
| O141  | O  | 0.06373 | 0.72144 | 0.14321 |
| O142  | O  | 0.66322 | 0.64427 | 0.13038 |
| O143  | O  | 0.70971 | 0.02043 | 0.20099 |
| O144  | O  | 0.63926 | 0.84495 | 0.21647 |
| Si145 | Si | 0.80340 | 0.26559 | 0.13251 |
| Si146 | Si | 0.68241 | 0.25916 | 0.07585 |
| O147  | O  | 0.41671 | 0.36004 | 0.09376 |
| O148  | O  | 0.50714 | 0.27003 | 0.06208 |
| O149  | O  | 0.90472 | 0.86843 | 0.21035 |
| O150  | O  | 0.53934 | 0.33161 | 0.12695 |
| O151  | O  | 0.40150 | 0.14932 | 0.11512 |
| O152  | O  | 0.76425 | 0.75136 | 0.24259 |
| O153  | O  | 0.63298 | 0.98384 | 0.07273 |
| O154  | O  | 0.17904 | 0.53621 | 0.32412 |
| O155  | O  | 0.05248 | 0.67698 | 0.21517 |
| Si156 | Si | 0.58858 | 0.23562 | 0.33724 |
| Si157 | Si | 0.40320 | 0.82724 | 0.31669 |
| Si158 | Si | 0.05730 | 0.18391 | 0.22236 |
| Si159 | Si | 0.13433 | 0.01555 | 0.28480 |
| O160  | O  | 0.86957 | 0.95357 | 0.26504 |
| O161  | O  | 0.18499 | 0.04290 | 0.18371 |
| O162  | O  | 0.31895 | 0.09806 | 0.28838 |
| O163  | O  | 0.01794 | 0.59868 | 0.27363 |
| O164  | O  | 0.91030 | 0.11898 | 0.15859 |
| Si165 | Si | 0.83812 | 0.12769 | 0.14292 |
| Si166 | Si | 0.96957 | 0.54489 | 0.25791 |
| Si167 | Si | 0.29429 | 0.91707 | 0.08728 |
| Si168 | Si | 0.89458 | 0.12518 | 0.32371 |
| Si169 | Si | 0.24223 | 0.58553 | 0.31912 |



|       |    |         |          |         |
|-------|----|---------|----------|---------|
| Si170 | Si | 0.02806 | 0.96724  | 0.14905 |
| O171  | O  | 0.42792 | 0.12833  | 0.25599 |
| O172  | O  | 0.18160 | 0.15132  | 0.15367 |
| O173  | O  | 0.11759 | -0.00121 | 0.23903 |
| O174  | O  | 0.33900 | 0.85934  | 0.29817 |
| Si175 | Si | 0.15035 | 0.97846  | 0.19717 |
| Si176 | Si | 0.24726 | 0.11564  | 0.27522 |
| Si177 | Si | 0.04744 | 0.53877  | 0.10697 |
| Si178 | Si | 0.78742 | 0.07723  | 0.06758 |
| O179  | O  | 0.29059 | 0.12873  | 0.08262 |
| O180  | O  | 0.86426 | 0.27848  | 0.10484 |
| O181  | O  | 0.86759 | 0.78365  | 0.06773 |
| O182  | O  | 0.07227 | 0.70291  | 0.29049 |
| O183  | O  | 0.47831 | 0.83861  | 0.09495 |
| O184  | O  | 0.43616 | 0.00544  | 0.07867 |
| O185  | O  | 0.20634 | 0.84765  | 0.32074 |
| O186  | O  | 0.79524 | 0.06967  | 0.15911 |
| Si187 | Si | 0.35690 | 0.33167  | 0.28478 |
| Si188 | Si | 0.08918 | 0.68010  | 0.10580 |
| O189  | O  | 0.95388 | 0.66988  | 0.16522 |
| O190  | O  | 0.31229 | 0.27133  | 0.27311 |
| O191  | O  | 0.91793 | 0.04610  | 0.22296 |
| O192  | O  | 0.81213 | 0.57704  | 0.32665 |
| O193  | O  | 0.36222 | 0.66338  | 0.30024 |
| O194  | O  | 0.51175 | 0.24405  | 0.33925 |
| Si195 | Si | 0.18230 | 0.11635  | 0.19681 |
| Si196 | Si | 0.27657 | 0.43464  | 0.24817 |
| Si197 | Si | 0.15344 | 0.31611  | 0.09186 |
| Si198 | Si | 0.53476 | 0.76439  | 0.28173 |
| Si199 | Si | 0.24102 | 0.25585  | 0.28868 |
| O200  | O  | 0.72344 | 0.11838  | 0.32300 |
| O201  | O  | 0.89685 | 0.56280  | 0.26924 |
| O202  | O  | 0.98009 | 0.55067  | 0.08537 |
| O203  | O  | 0.51922 | 0.98009  | 0.28252 |
| O204  | O  | 0.40286 | 0.66192  | 0.10888 |
| O205  | O  | 0.40907 | 0.16764  | 0.32659 |
| O206  | O  | 0.47996 | 0.35996  | 0.19012 |
| O207  | O  | 0.03474 | 0.49731  | 0.14628 |
| O208  | O  | 0.09618 | 0.49842  | 0.07962 |
| O209  | O  | 0.21500 | 0.57388  | 0.19428 |
| Si210 | Si | 0.70889 | 0.39877  | 0.06834 |
| Si211 | Si | 0.87717 | 0.66132  | 0.16234 |
| Si212 | Si | 0.49411 | 0.87012  | 0.13825 |
| Si213 | Si | 0.34383 | 0.58909  | 0.29284 |
| O214  | O  | 0.98209 | 0.26500  | 0.12920 |
| O215  | O  | 0.19253 | 0.49470  | 0.13291 |
| O216  | O  | 0.36679 | 0.89234  | 0.07621 |
| O217  | O  | 0.31085 | 0.52515  | 0.15447 |
| O218  | O  | 0.71926 | 0.40563  | 0.11626 |
| O219  | O  | 0.16336 | 0.69665  | 0.09772 |
| Si220 | Si | 0.64896 | 0.42314  | 0.21443 |
| Si221 | Si | 0.87687 | 0.39235  | 0.32413 |
| Si222 | Si | 0.77284 | 0.81687  | 0.26619 |

|       |    |         |         |         |
|-------|----|---------|---------|---------|
| Si223 | Si | 0.62490 | 0.81580 | 0.17330 |
| O224  | O  | 0.61833 | 0.27708 | 0.30090 |
| O225  | O  | 0.45026 | 0.24492 | 0.22294 |
| O226  | O  | 0.23027 | 0.18156 | 0.29849 |
| O227  | O  | 0.71142 | 0.66467 | 0.31855 |
| O228  | O  | 0.53028 | 0.32435 | 0.25705 |
| O229  | O  | 0.39971 | 0.30050 | 0.32123 |
| O230  | O  | 0.29822 | 0.20639 | 0.14243 |
| Si231 | Si | 0.60514 | 0.30748 | 0.25752 |
| Si232 | Si | 0.46968 | 0.14304 | 0.13734 |
| Si233 | Si | 0.54311 | 0.26372 | 0.10435 |
| O234  | O  | 0.60009 | 0.39676 | 0.18178 |
| O235  | O  | 0.53109 | 0.50085 | 0.06948 |
| O236  | O  | 0.25545 | 0.37661 | 0.22016 |
| O237  | O  | 0.64561 | 0.37279 | 0.25155 |
| O238  | O  | 0.03584 | 0.97451 | 0.10121 |
| O239  | O  | 0.85541 | 0.58767 | 0.15455 |
| Si240 | Si | 0.47693 | 0.65346 | 0.12366 |
| Si241 | Si | 0.98465 | 0.47599 | 0.32981 |
| O242  | O  | 0.67187 | 0.57400 | 0.06430 |
| O243  | O  | 0.63160 | 0.49625 | 0.22783 |
| O244  | O  | 0.06891 | 0.17610 | 0.12165 |
| O245  | O  | 0.88005 | 0.26847 | 0.36706 |
| O246  | O  | 0.83378 | 0.12108 | 0.09476 |
| O247  | O  | 0.49983 | 0.07367 | 0.12690 |
| O248  | O  | 0.63587 | 0.93537 | 0.27110 |
| O249  | O  | 0.24180 | 0.60925 | 0.12240 |
| O250  | O  | 0.05827 | 0.23974 | 0.18930 |
| O251  | O  | 0.74881 | 0.94875 | 0.13952 |
| O252  | O  | 0.81482 | 0.19877 | 0.15673 |
| Si253 | Si | 0.91676 | 0.26474 | 0.32358 |
| Si254 | Si | 0.00835 | 0.03804 | 0.32619 |
| Si255 | Si | 0.33145 | 0.00624 | 0.15981 |
| Si256 | Si | 0.36239 | 0.49052 | 0.18344 |
| O257  | O  | 0.22980 | 0.29991 | 0.32789 |
| O258  | O  | 0.72087 | 0.06445 | 0.09017 |
| O259  | O  | 0.31481 | 0.43414 | 0.09293 |
| O260  | O  | 0.83395 | 0.81230 | 0.29578 |
| O261  | O  | 0.08139 | 0.60546 | 0.11678 |
| O262  | O  | 0.90449 | 0.19515 | 0.30392 |
| O263  | O  | 0.13417 | 0.36273 | 0.21622 |
| O264  | O  | 0.03829 | 0.34108 | 0.26690 |
| O265  | O  | 0.66258 | 0.15642 | 0.26320 |
| Si266 | Si | 0.16515 | 0.33238 | 0.34505 |
| Si267 | Si | 0.12939 | 0.47071 | 0.32061 |
| Si268 | Si | 0.67371 | 0.57353 | 0.11307 |
| Si269 | Si | 0.23786 | 0.55013 | 0.15128 |
| Si270 | Si | 0.17250 | 0.54504 | 0.22981 |
| Si271 | Si | 0.01439 | 0.71321 | 0.17982 |
| Si272 | Si | 0.78546 | 0.64401 | 0.30749 |
| O273  | O  | 0.21591 | 0.48577 | 0.25038 |
| O274  | O  | 0.78382 | 0.63141 | 0.26017 |
| O275  | O  | 0.74182 | 0.25185 | 0.10562 |

|       |    |         |         |         |
|-------|----|---------|---------|---------|
| O276  | O  | 0.98435 | 0.47837 | 0.28119 |
| O277  | O  | 0.25043 | 0.66243 | 0.33519 |
| O278  | O  | 0.27046 | 0.75800 | 0.28613 |
| O279  | O  | 0.11101 | 0.29348 | 0.32119 |
| O280  | O  | 0.40366 | 0.55374 | 0.27308 |
| O281  | O  | 0.72760 | 0.17442 | 0.39142 |
| Si282 | Si | 0.93756 | 0.28328 | 0.09155 |
| Si283 | Si | 0.64193 | 0.05392 | 0.18996 |
| Si284 | Si | 0.07981 | 0.39389 | 0.24404 |
| Si285 | Si | 0.91510 | 0.53237 | 0.06249 |
| Si286 | Si | 0.05306 | 0.24509 | 0.14128 |
| O287  | O  | 0.42124 | 0.53604 | 0.19526 |
| O288  | O  | 0.04704 | 0.69538 | 0.06643 |
| O289  | O  | 0.98186 | 0.53627 | 0.21091 |
| O290  | O  | 0.51548 | 0.45568 | 0.14184 |
| O291  | O  | 0.99276 | 0.78470 | 0.19306 |
| O292  | O  | 0.14052 | 0.94453 | 0.30154 |
| O293  | O  | 0.55431 | 0.83435 | 0.15757 |
| O294  | O  | 0.19888 | 0.05834 | 0.28814 |
| H295  | H  | 0.70576 | 0.59740 | 0.05126 |
| H296  | H  | 0.56628 | 0.47418 | 0.05958 |
| H297  | H  | 0.31267 | 0.47488 | 0.10727 |
| H298  | H  | 0.44269 | 0.39374 | 0.08221 |
| O299  | O  | 0.36001 | 0.76644 | 0.33982 |
| O300  | O  | 0.31202 | 0.55419 | 0.33258 |
| H301  | H  | 0.41872 | 0.27823 | 0.40183 |
| O302  | O  | 0.15880 | 0.32421 | 0.39254 |
| H303  | H  | 0.15602 | 0.28074 | 0.40195 |
| O304  | O  | 0.77633 | 0.23770 | 0.33218 |
| O305  | O  | 0.96373 | 0.09821 | 0.34028 |
| O306  | O  | 0.89967 | 0.78763 | 0.36134 |
| O307  | O  | 0.93389 | 0.53302 | 0.34213 |
| O308  | O  | 0.94696 | 0.41121 | 0.34398 |
| O309  | O  | 0.81666 | 0.36764 | 0.35103 |
| O310  | O  | 0.02394 | 0.76481 | 0.35624 |
| O311  | O  | 0.10000 | 0.89037 | 0.36247 |
| O312  | O  | 0.01656 | 0.98908 | 0.36402 |
| O313  | O  | 0.49916 | 0.98031 | 0.36219 |
| H314  | H  | 0.51380 | 0.02295 | 0.36835 |
| O315  | O  | 0.65184 | 0.44603 | 0.05417 |
| O316  | O  | 0.77505 | 0.41170 | 0.04480 |
| H317  | H  | 0.80231 | 0.44498 | 0.05544 |
| H318  | H  | 0.66460 | 0.49114 | 0.05211 |
| O319  | O  | 0.68069 | 0.20286 | 0.04296 |
| H320  | H  | 0.72057 | 0.18324 | 0.03345 |
| H321  | H  | 0.31092 | 0.09762 | 0.06539 |
| O322  | O  | 0.13016 | 0.29359 | 0.04820 |
| H323  | H  | 0.14074 | 0.24848 | 0.04471 |
| O324  | O  | 0.21076 | 0.49009 | 0.05393 |
| H325  | H  | 0.25157 | 0.46742 | 0.05473 |
| H326  | H  | 0.23980 | 0.82499 | 0.08744 |
| H327  | H  | 0.46670 | 0.29250 | 0.06522 |
| O328  | O  | 0.44219 | 0.85635 | 0.02004 |

|       |    |          |         |         |
|-------|----|----------|---------|---------|
| H329  | H  | 0.46694  | 0.82394 | 0.00656 |
| O330  | O  | 0.22260  | 0.62258 | 0.04439 |
| H331  | H  | 0.21772  | 0.57588 | 0.04559 |
| H332  | H  | 0.41313  | 0.96672 | 0.07118 |
| H333  | H  | 0.02399  | 0.73529 | 0.06751 |
| H334  | H  | 0.86386  | 0.74253 | 0.05487 |
| H335  | H  | 0.68910  | 0.92102 | 0.07051 |
| H336  | H  | 0.52884  | 0.73085 | 0.09331 |
| O337  | O  | 0.26730  | 0.95125 | 0.04768 |
| H338  | H  | 0.22276  | 0.96562 | 0.04981 |
| O339  | O  | 0.89235  | 0.59044 | 0.03380 |
| O340  | O  | 0.92650  | 0.46665 | 0.03755 |
| H341  | H  | 0.91986  | 0.59777 | 0.01104 |
| H342  | H  | 0.97083  | 0.45332 | 0.03679 |
| H343  | H  | 0.58880  | 0.97017 | 0.07221 |
| O344  | O  | 0.82143  | 0.01093 | 0.05544 |
| H345  | H  | 0.79662  | 0.97245 | 0.06039 |
| O346  | O  | 0.77753  | 0.12037 | 0.02718 |
| H347  | H  | 0.77541  | 0.09539 | 0.00295 |
| O348  | O  | 0.16837  | 0.16881 | 0.07498 |
| H349  | H  | 0.21385  | 0.15684 | 0.07245 |
| O350  | O  | 0.04040  | 0.06526 | 0.04552 |
| O351  | O  | 0.13514  | 0.98625 | 0.05014 |
| H352  | H  | 1.00046  | 0.08260 | 0.05529 |
| O353  | O  | 0.94688  | 0.23310 | 0.05500 |
| O354  | O  | 0.95630  | 0.35537 | 0.07894 |
| H355  | H  | 0.97544  | 0.24826 | 0.03439 |
| H356  | H  | 0.92368  | 0.37976 | 0.06502 |
| H357  | H  | 0.11776  | 0.96976 | 0.02542 |
| O358  | O  | 0.60457  | 0.10832 | 0.07924 |
| H359  | H  | 0.62931  | 0.14004 | 0.06403 |
| Si360 | Si | 0.87135  | 0.53324 | 0.31163 |
| Si361 | Si | 0.39454  | 0.10688 | 0.29688 |
| O362  | O  | 0.63061  | 0.25823 | 0.37581 |
| Si363 | Si | 0.80525  | 0.29311 | 0.36246 |
| O364  | O  | 0.75281  | 0.29446 | 0.39800 |
| Si365 | Si | 0.69383  | 0.24267 | 0.40234 |
| O366  | O  | 0.66720  | 0.24219 | 0.44734 |
| H367  | H  | 0.69682  | 0.22822 | 0.46765 |
| Si368 | Si | 0.02584  | 0.91299 | 0.36584 |
| Si369 | Si | 0.96943  | 0.81927 | 0.36552 |
| O370  | O  | -0.01908 | 0.87702 | 0.33234 |
| O371  | O  | -0.00826 | 0.86838 | 0.40133 |
| Ir372 | Ir | 0.65651  | 0.55526 | 0.52322 |
| C373  | C  | 0.63980  | 0.57775 | 0.46638 |
| C374  | C  | 0.60411  | 0.53906 | 0.44168 |
| C375  | C  | 0.59199  | 0.55310 | 0.40263 |
| C376  | C  | 0.65274  | 0.64927 | 0.41026 |
| C377  | C  | 0.66363  | 0.63252 | 0.44918 |
| C378  | C  | 0.66473  | 0.55988 | 0.58732 |
| C379  | C  | 0.68473  | 0.50049 | 0.57441 |
| O380  | O  | 0.58072  | 0.48363 | 0.45647 |
| H381  | H  | 0.65456  | 0.45992 | 0.57966 |

|      |   |         |         |         |
|------|---|---------|---------|---------|
| H382 | H | 0.61864 | 0.56580 | 0.60102 |
| P383 | P | 0.59624 | 0.47390 | 0.50463 |
| C384 | C | 0.51649 | 0.46679 | 0.52490 |
| C385 | C | 0.62406 | 0.39258 | 0.50371 |
| O386 | O | 0.69905 | 0.67277 | 0.47193 |
| H387 | H | 0.69986 | 0.59382 | 0.59700 |
| H388 | H | 0.73470 | 0.48913 | 0.57270 |
| P389 | P | 0.71006 | 0.64620 | 0.51806 |
| C390 | C | 0.79627 | 0.64314 | 0.52024 |
| C391 | C | 0.69038 | 0.71722 | 0.54616 |
| C392 | C | 0.61700 | 0.60837 | 0.38756 |
| H393 | H | 0.56378 | 0.52238 | 0.38407 |
| H394 | H | 0.67092 | 0.69320 | 0.39837 |
| H395 | H | 0.61067 | 0.37026 | 0.47578 |
| H396 | H | 0.60367 | 0.36601 | 0.52828 |
| H397 | H | 0.67542 | 0.39210 | 0.50625 |
| H398 | H | 0.50751 | 0.41896 | 0.53558 |
| H399 | H | 0.48225 | 0.47824 | 0.50184 |
| H400 | H | 0.51038 | 0.50019 | 0.54915 |
| H401 | H | 0.81554 | 0.65872 | 0.49191 |
| H402 | H | 0.81084 | 0.59449 | 0.52542 |
| H403 | H | 0.81485 | 0.67349 | 0.54364 |
| H404 | H | 0.66157 | 0.70445 | 0.57166 |
| H405 | H | 0.66309 | 0.74916 | 0.52749 |
| H406 | H | 0.73249 | 0.74195 | 0.55644 |

#### 4.2. Ir-bound Ir(C<sub>2</sub>H<sub>4</sub>)(<sup>t</sup>Bu<sup>4</sup>POCOP)/Si<sup>17</sup>O<sub>2</sub>

```

data_IrPOCOP_Ir-bound
_symmetry_space_group_name_H-M      "P 1"
_symmetry_int_tables_number          1
loop_
_symmetry_equiv_pos_as_xyz
  x, y, z
_cell_length_a                       11.6396
_cell_length_b                       13.5967
_cell_length_c                       40
_cell_angle_alpha                    90
_cell_angle_beta                     90
_cell_angle_gamma                    88.6455
loop_
_atom_site_label
_atom_site_occupancy
_atom_site_fract_x
_atom_site_fract_y
_atom_site_fract_z
H1      1.0000 0.14255 0.08986 0.33920
H2      1.0000 0.12544 0.84326 0.27981
H3      1.0000 0.24322 0.63036 0.31227
H4      1.0000 0.12474 0.53184 0.27938
H5      1.0000 0.48233 0.66402 0.31943
H6      1.0000 0.30970 0.93434 0.31477
H7      1.0000 0.45777 0.00093 0.43244
H8      1.0000 0.52949 0.15025 0.31871
H9      1.0000 0.61823 0.29883 0.30380
H10     1.0000 0.67603 0.61777 0.53055

```

|      |        |         |         |         |
|------|--------|---------|---------|---------|
| H11  | 1.0000 | 0.88051 | 0.36150 | 0.33286 |
| H12  | 1.0000 | 0.75989 | 0.85615 | 0.29752 |
| H13  | 1.0000 | 0.55360 | 0.94476 | 0.32603 |
| H14  | 1.0000 | 0.74594 | 0.68924 | 0.30270 |
| H15  | 1.0000 | 0.97013 | 0.74867 | 0.28907 |
| H16  | 1.0000 | 0.53342 | 0.50124 | 0.31094 |
| O1   | 1.0000 | 0.48536 | 0.47859 | 0.47146 |
| O2   | 1.0000 | 0.38017 | 0.04918 | 0.36436 |
| O3   | 1.0000 | 0.37822 | 0.02393 | 0.43224 |
| O4   | 1.0000 | 0.00350 | 0.00274 | 0.37524 |
| O5   | 1.0000 | 0.26047 | 0.32164 | 0.37622 |
| O6   | 1.0000 | 0.18274 | 0.44450 | 0.33079 |
| O7   | 1.0000 | 0.20882 | 0.49901 | 0.39489 |
| O8   | 1.0000 | 0.44431 | 0.39330 | 0.41157 |
| O9   | 1.0000 | 0.19767 | 0.10260 | 0.40098 |
| O10  | 1.0000 | 0.47764 | 0.30446 | 0.35353 |
| O11  | 1.0000 | 0.40074 | 0.20183 | 0.40589 |
| O12  | 1.0000 | 0.03329 | 0.38525 | 0.37826 |
| O13  | 1.0000 | 0.39306 | 0.55262 | 0.35853 |
| O14  | 1.0000 | 0.42501 | 0.85568 | 0.36442 |
| O15  | 1.0000 | 0.21054 | 0.93153 | 0.37087 |
| O16  | 1.0000 | 0.39484 | 0.58357 | 0.42168 |
| O17  | 1.0000 | 0.22557 | 0.68143 | 0.38232 |
| O18  | 1.0000 | 0.06122 | 0.60398 | 0.34168 |
| O19  | 1.0000 | 0.99823 | 0.71753 | 0.39501 |
| O20  | 1.0000 | 0.09807 | 0.79098 | 0.33973 |
| O21  | 1.0000 | 0.78309 | 0.06875 | 0.39855 |
| O22  | 1.0000 | 0.67654 | 0.20276 | 0.35835 |
| O23  | 1.0000 | 0.87620 | 0.11781 | 0.33854 |
| O24  | 1.0000 | 0.86566 | 0.25901 | 0.38615 |
| O25  | 1.0000 | 0.80934 | 0.45788 | 0.38438 |
| O26  | 1.0000 | 0.63375 | 0.57230 | 0.35776 |
| O27  | 1.0000 | 0.80090 | 0.94520 | 0.35043 |
| O28  | 1.0000 | 0.63217 | 0.78589 | 0.34558 |
| O29  | 1.0000 | 0.62062 | 0.51768 | 0.41960 |
| O30  | 1.0000 | 0.61798 | 0.93554 | 0.38902 |
| O31  | 1.0000 | 0.81820 | 0.85066 | 0.40673 |
| O32  | 1.0000 | 0.85471 | 0.75541 | 0.34847 |
| O33  | 1.0000 | 0.78211 | 0.64965 | 0.40092 |
| O34  | 1.0000 | 0.97794 | 0.94106 | 0.31084 |
| Si1  | 1.0000 | 0.48764 | 0.49171 | 0.43250 |
| Si2  | 1.0000 | 0.13697 | 0.03619 | 0.37176 |
| Si3  | 1.0000 | 0.16742 | 0.41131 | 0.37008 |
| Si4  | 1.0000 | 0.39641 | 0.30884 | 0.38703 |
| Si5  | 1.0000 | 0.34062 | 0.09615 | 0.40137 |
| Si6  | 1.0000 | 0.51111 | 0.57319 | 0.33704 |
| Si7  | 1.0000 | 0.30740 | 0.58231 | 0.38988 |
| Si8  | 1.0000 | 0.15402 | 0.55347 | 0.31457 |
| Si9  | 1.0000 | 0.33263 | 0.94080 | 0.35146 |
| Si10 | 1.0000 | 0.09639 | 0.69823 | 0.36568 |
| Si11 | 1.0000 | 0.03834 | 0.82908 | 0.30497 |
| Si12 | 1.0000 | 0.57453 | 0.24030 | 0.33259 |
| Si13 | 1.0000 | 0.91981 | 0.00212 | 0.34174 |
| Si14 | 1.0000 | 0.89599 | 0.36881 | 0.36986 |
| Si15 | 1.0000 | 0.80067 | 0.16261 | 0.37102 |
| Si16 | 1.0000 | 0.75753 | 0.95097 | 0.38941 |
| Si17 | 1.0000 | 0.55778 | 0.88324 | 0.35611 |

|      |        |         |         |         |
|------|--------|---------|---------|---------|
| Si18 | 1.0000 | 0.74845 | 0.77636 | 0.32225 |
| Si19 | 1.0000 | 0.71223 | 0.54820 | 0.39075 |
| Si20 | 1.0000 | 0.86029 | 0.74282 | 0.38909 |
| C1   | 1.0000 | 0.47443 | 0.47856 | 0.59602 |
| C2   | 1.0000 | 0.49812 | 0.48002 | 0.63014 |
| C3   | 1.0000 | 0.60655 | 0.44722 | 0.64093 |
| C4   | 1.0000 | 0.69012 | 0.41521 | 0.61790 |
| C5   | 1.0000 | 0.66259 | 0.41772 | 0.58393 |
| C6   | 1.0000 | 0.55518 | 0.44996 | 0.57173 |
| O35  | 1.0000 | 0.74433 | 0.38606 | 0.56077 |
| Ir1  | 1.0000 | 0.51709 | 0.44904 | 0.52236 |
| O36  | 1.0000 | 0.63303 | 0.44103 | 0.67466 |
| H17  | 1.0000 | 0.77396 | 0.38839 | 0.62642 |
| O37  | 1.0000 | 0.36458 | 0.50534 | 0.58568 |
| H18  | 1.0000 | 0.43257 | 0.50482 | 0.64777 |
| P1   | 1.0000 | 0.34312 | 0.50185 | 0.54439 |
| C7   | 1.0000 | 0.29992 | 0.63512 | 0.53709 |
| P2   | 1.0000 | 0.70710 | 0.40358 | 0.52070 |
| C8   | 1.0000 | 0.75640 | 0.28060 | 0.50358 |
| H19  | 1.0000 | 0.76893 | 0.66775 | 0.50010 |
| C9   | 1.0000 | 0.88376 | 0.25708 | 0.51030 |
| C10  | 1.0000 | 0.72897 | 0.27612 | 0.46606 |
| C11  | 1.0000 | 0.68350 | 0.20407 | 0.52181 |
| C12  | 1.0000 | 0.19655 | 0.67102 | 0.55787 |
| C13  | 1.0000 | 0.27901 | 0.65387 | 0.49969 |
| C14  | 1.0000 | 0.40644 | 0.69257 | 0.54792 |
| C15  | 1.0000 | 0.22130 | 0.41380 | 0.54242 |
| C16  | 1.0000 | 0.27386 | 0.30888 | 0.54479 |
| C17  | 1.0000 | 0.16456 | 0.42574 | 0.50798 |
| C18  | 1.0000 | 0.13740 | 0.42715 | 0.57179 |
| C19  | 1.0000 | 0.79955 | 0.51199 | 0.50830 |
| C20  | 1.0000 | 0.85689 | 0.49763 | 0.47411 |
| C21  | 1.0000 | 0.88984 | 0.53023 | 0.53518 |
| H20  | 1.0000 | 0.79366 | 0.48169 | 0.45471 |
| H21  | 1.0000 | 0.92318 | 0.43903 | 0.47413 |
| H22  | 1.0000 | 0.89886 | 0.56634 | 0.46704 |
| H23  | 1.0000 | 0.85103 | 0.54762 | 0.55954 |
| H24  | 1.0000 | 0.94061 | 0.59369 | 0.52739 |
| H25  | 1.0000 | 0.94828 | 0.46696 | 0.53848 |
| H26  | 1.0000 | 0.94029 | 0.30683 | 0.49685 |
| H27  | 1.0000 | 0.90436 | 0.18195 | 0.50150 |
| H28  | 1.0000 | 0.90376 | 0.26038 | 0.53711 |
| H29  | 1.0000 | 0.69678 | 0.20533 | 0.54897 |
| H30  | 1.0000 | 0.70924 | 0.13052 | 0.51258 |
| H31  | 1.0000 | 0.59143 | 0.21508 | 0.51664 |
| H32  | 1.0000 | 0.78612 | 0.32110 | 0.45100 |
| H33  | 1.0000 | 0.63965 | 0.29951 | 0.46093 |
| H34  | 1.0000 | 0.74029 | 0.19959 | 0.45745 |
| H35  | 1.0000 | 0.42681 | 0.68220 | 0.57450 |
| H36  | 1.0000 | 0.38855 | 0.77143 | 0.54364 |
| H37  | 1.0000 | 0.48281 | 0.67175 | 0.53315 |
| H38  | 1.0000 | 0.19686 | 0.62519 | 0.49109 |
| H39  | 1.0000 | 0.34743 | 0.62155 | 0.48401 |
| H40  | 1.0000 | 0.27645 | 0.73385 | 0.49530 |
| H41  | 1.0000 | 0.11603 | 0.63843 | 0.54957 |
| H42  | 1.0000 | 0.18640 | 0.75126 | 0.55476 |
| H43  | 1.0000 | 0.20826 | 0.65592 | 0.58463 |

|     |        |         |         |         |
|-----|--------|---------|---------|---------|
| H44 | 1.0000 | 0.22920 | 0.42368 | 0.48790 |
| H45 | 1.0000 | 0.11415 | 0.49448 | 0.50576 |
| H46 | 1.0000 | 0.10659 | 0.36427 | 0.50373 |
| H47 | 1.0000 | 0.18185 | 0.41364 | 0.59560 |
| H48 | 1.0000 | 0.06887 | 0.37304 | 0.56956 |
| H49 | 1.0000 | 0.09673 | 0.50045 | 0.57293 |
| H50 | 1.0000 | 0.32627 | 0.29033 | 0.52277 |
| H51 | 1.0000 | 0.20318 | 0.25655 | 0.54608 |
| H52 | 1.0000 | 0.32677 | 0.29860 | 0.56734 |
| C22 | 1.0000 | 0.71822 | 0.60290 | 0.50642 |
| H53 | 1.0000 | 0.65224 | 0.59516 | 0.48705 |
| H54 | 1.0000 | 0.49092 | 0.34376 | 0.53389 |
| C23 | 1.0000 | 0.50930 | 0.48294 | 0.73206 |
| H55 | 1.0000 | 0.92926 | 0.56919 | 0.69691 |
| C24 | 1.0000 | 0.51126 | 0.54473 | 0.76420 |
| C25 | 1.0000 | 0.52916 | 0.37339 | 0.73989 |
| C26 | 1.0000 | 0.76285 | 0.54204 | 0.71894 |
| C27 | 1.0000 | 0.80436 | 0.45122 | 0.73860 |
| C28 | 1.0000 | 0.77135 | 0.63549 | 0.74049 |
| H56 | 1.0000 | 0.79334 | 0.38321 | 0.72425 |
| H57 | 1.0000 | 0.75931 | 0.44407 | 0.76258 |
| H58 | 1.0000 | 0.89670 | 0.45722 | 0.74427 |
| H59 | 1.0000 | 0.74046 | 0.70120 | 0.72682 |
| H60 | 1.0000 | 0.86215 | 0.64671 | 0.74700 |
| H61 | 1.0000 | 0.72316 | 0.63117 | 0.76400 |
| H62 | 1.0000 | 0.58969 | 0.53107 | 0.77887 |
| H63 | 1.0000 | 0.43757 | 0.52589 | 0.78007 |
| H64 | 1.0000 | 0.50391 | 0.62411 | 0.75895 |
| H65 | 1.0000 | 0.60800 | 0.35877 | 0.75423 |
| H66 | 1.0000 | 0.45662 | 0.34676 | 0.75487 |
| H67 | 1.0000 | 0.81296 | 0.61835 | 0.67282 |
| P3  | 1.0000 | 0.61205 | 0.53877 | 0.70047 |
| C29 | 1.0000 | 0.38936 | 0.49641 | 0.71607 |
| H68 | 1.0000 | 0.32315 | 0.47590 | 0.73430 |
| H69 | 1.0000 | 0.37955 | 0.44878 | 0.69413 |
| H70 | 1.0000 | 0.53365 | 0.32938 | 0.71689 |
| C30 | 1.0000 | 0.84123 | 0.55536 | 0.68828 |
| H71 | 1.0000 | 0.84407 | 0.48971 | 0.67236 |
| H72 | 1.0000 | 0.37184 | 0.57304 | 0.70843 |

<sup>1</sup> Z. Huang, M. Brookhart, A. S. Goldman, S. Kundu, A. Ray, S. L. Scott, B. C. Vicente, *Adv. Synth. Catal.* 2009, **351**, 188–206.

<sup>2</sup> X. Jia, C. Qin, T. Friedberger, Z. Guan, Z. Huang, *Sci. Adv.* 2016, **2**, e1501591.

<sup>3</sup> A. L. Paterson, D.-J. Liu, U. Kanbur, A. D. Sadow, F. A. Perras, *Inorg. Chem. Frontiers*, 2021, **8**, 1416.

<sup>4</sup> F.A. Perras, U. Kanbur, A.L. Paterson, P. Chatterjee, I.I. Slowing, A.D. Sadow, *Inorg. Chem.* 2022, **61**, 1067.

<sup>5</sup> A. Zagdoun, G. Casano, O. Ouari, M. Schwarzwälder, A. J. Rossini, F. Aussenac, M. Yulikov, G. Jeschke, C. Copéret, P. Tordo, L. Emsley, *J. Am. Chem. Soc.* 2013, **135**, 12790.

<sup>6</sup> T. Gullion, J. Schaeffer, *J. Magn. Reson.* 1989, **81**, 196.

<sup>7</sup> E. Nimerovski, R. Gupta, J. Yehl, M. Li, T. Polenova, A. Goldbourt, *J. Magn. Reson.* 2014, **204**, 107.

<sup>8</sup> E. Nimerovski, M. Makrinich, A. Goldbourt, *J. Chem. Phys.* 2017, **146**, 124202.



- 
- <sup>9</sup> H. Nagashima, J. Trébosco, Y. Kon, K. Sato, O. Lafon, J.-P. Amoureux, *J. Am. Chem. Soc.* 2020, **142**, 10659.
- <sup>10</sup> A. Bielecki, A. C. Kolbert, M. H. Levitt, *Chem. Phys. Lett.* 1989, **155**, 341.
- <sup>11</sup> P. Giannozzi, S. Baroni, N. Bonini, M. Calandra, R. Car, C. Cavazzoni, D. Ceresoli, G. L. Chiarotti, M. Cococcioni, I. Dabo, A. D. Corso, S. de Gironcoli, S. Fabris, G. Fratesi, R. Gebauer, U. Gerstmann, C. Gougoussis, A. Kokalj, M. Lazzeri, L. Martin-Samos, N. Marzari, F. Mauri, R. Mazzarello, S. Paolini, A. Pasquarello, L. Paulatto, C. Sbraccia, S. Scandolo, G. Sclauzero, A. P. Seitsonen, A. Smogunov, P. Umari and R. M. Wentzcovitch, *J Phys Condens Matter*, 2009, **21**, 395502.
- <sup>12</sup> P. Giannozzi, O. Andreussi, T. Brumme, O. Bunau, M. B. Nardelli, M. Calandra, R. Car, C. Cavazzoni, D. Ceresoli, M. Cococcioni, N. Colonna, I. Carnimeo, A. D. Corso, S. de Gironcoli, P. Delugas, R. A. D. Jr, A. Ferretti, A. Floris, G. Fratesi, G. Fugallo, R. Gebauer, U. Gerstmann, F. Giustino, T. Gorni, J. Jia, M. Kawamura, H.-Y. Ko, A. Kokalj, E. Küçükbenli, M. Lazzeri, M. Marsili, N. Marzari, F. Mauri, N. L. Nguyen, H.-V. Nguyen, A. Otero-de-la-Roza, L. Paulatto, S. Poncé, D. Rocca, R. Sabatini, B. Santra, M. Schlipf, A. P. Seitsonen, A. Smogunov, I. Timrov, T. Thonhauser, P. Umari, N. Vast, X. Wu and S. Baroni, *J Phys Condens Matter*, 2017, **29**, 465901.
- <sup>13</sup> P. Giannozzi, O. Baseggio, P. Bonfà, D. Brunato, R. Car, I. Carnimeo, C. Cavazzoni, S. de Gironcoli, P. Delugas, F. F. Ruffino, A. Ferretti, N. Marzari, I. Timrov, A. Urru and S. Baroni, *J Chem Phys*, 2020, **152**, 154105.
- <sup>14</sup> J. P. Perdew, K. Burke and M. Ernzerhof, *Phys Rev Lett*, 1996, **77**, 3865–3868.
- <sup>15</sup> P. Ugliengo, M. Sodupe, F. Musso, I. J. Bush, R. Orlando and R. Dovesi, *Adv. Mater.*, 2008, **20**, 4579.
- <sup>16</sup> C. J. Pickard and F. Mauri, *Phys Rev B*, 2001, **63**, 245101.
- <sup>17</sup> M. Profeta, F. Mauri and C. J. Pickard, *J Am Chem Soc*, 2003, **125**, 541.
- <sup>18</sup> N. Varini, D. Ceresoli, L. Martin-Samos, I. Girotto and C. Cavazzoni, *Comput Phys Commun*, 2013, **184**, 1827.
- <sup>19</sup> C. Tantardini, A. G. Kvashnin and D. Ceresoli, *Materials*, 2022, **15**, 3347.
- <sup>20</sup> S. Sturniolo, T. F. G. Green, R. M. Hanson, M. Zilka, K. Refson, P. Hodgkinson, S. P. Brown and J. R. Yates, *Solid State Nucl Mag*, 2016, **78**, 64.
- <sup>21</sup> W. Makulski, *Phys Chem Chem Phys*, 2022, **24**, 8950.
- <sup>22</sup> R. E. Wasylishen and D. L. Bryce, *J Chem Phys*, 2002, **117**, 10061.
- <sup>23</sup> C. J. Jameson, A. D. Dios and A. K. Jameson, *Chem Phys Lett*, 1990, **167**, 575.
- <sup>24</sup> L. Lemaître, M. E. Smith, A. Watts, *Solid State Nucl. Magn. Reson.* **2004**, *26*, 215-235.
- <sup>25</sup> J. Cunningham, F. A. Perras, *J. Magn. Reson. Open*, 2022, **11-12**, 100066.
- <sup>26</sup> A. Comas-Vives, *Phys. Chem. Chem. Phys.* 2016, **18**, 7475.
